# Supplementary figures and images for: Hypermentalizing and Borderline Personality Disorder: A Meta-Analytic Review
Source: Atypon-hosted journal article supplement (doi:10.1176/appi.psychotherapy.20210018), 2022-01-31

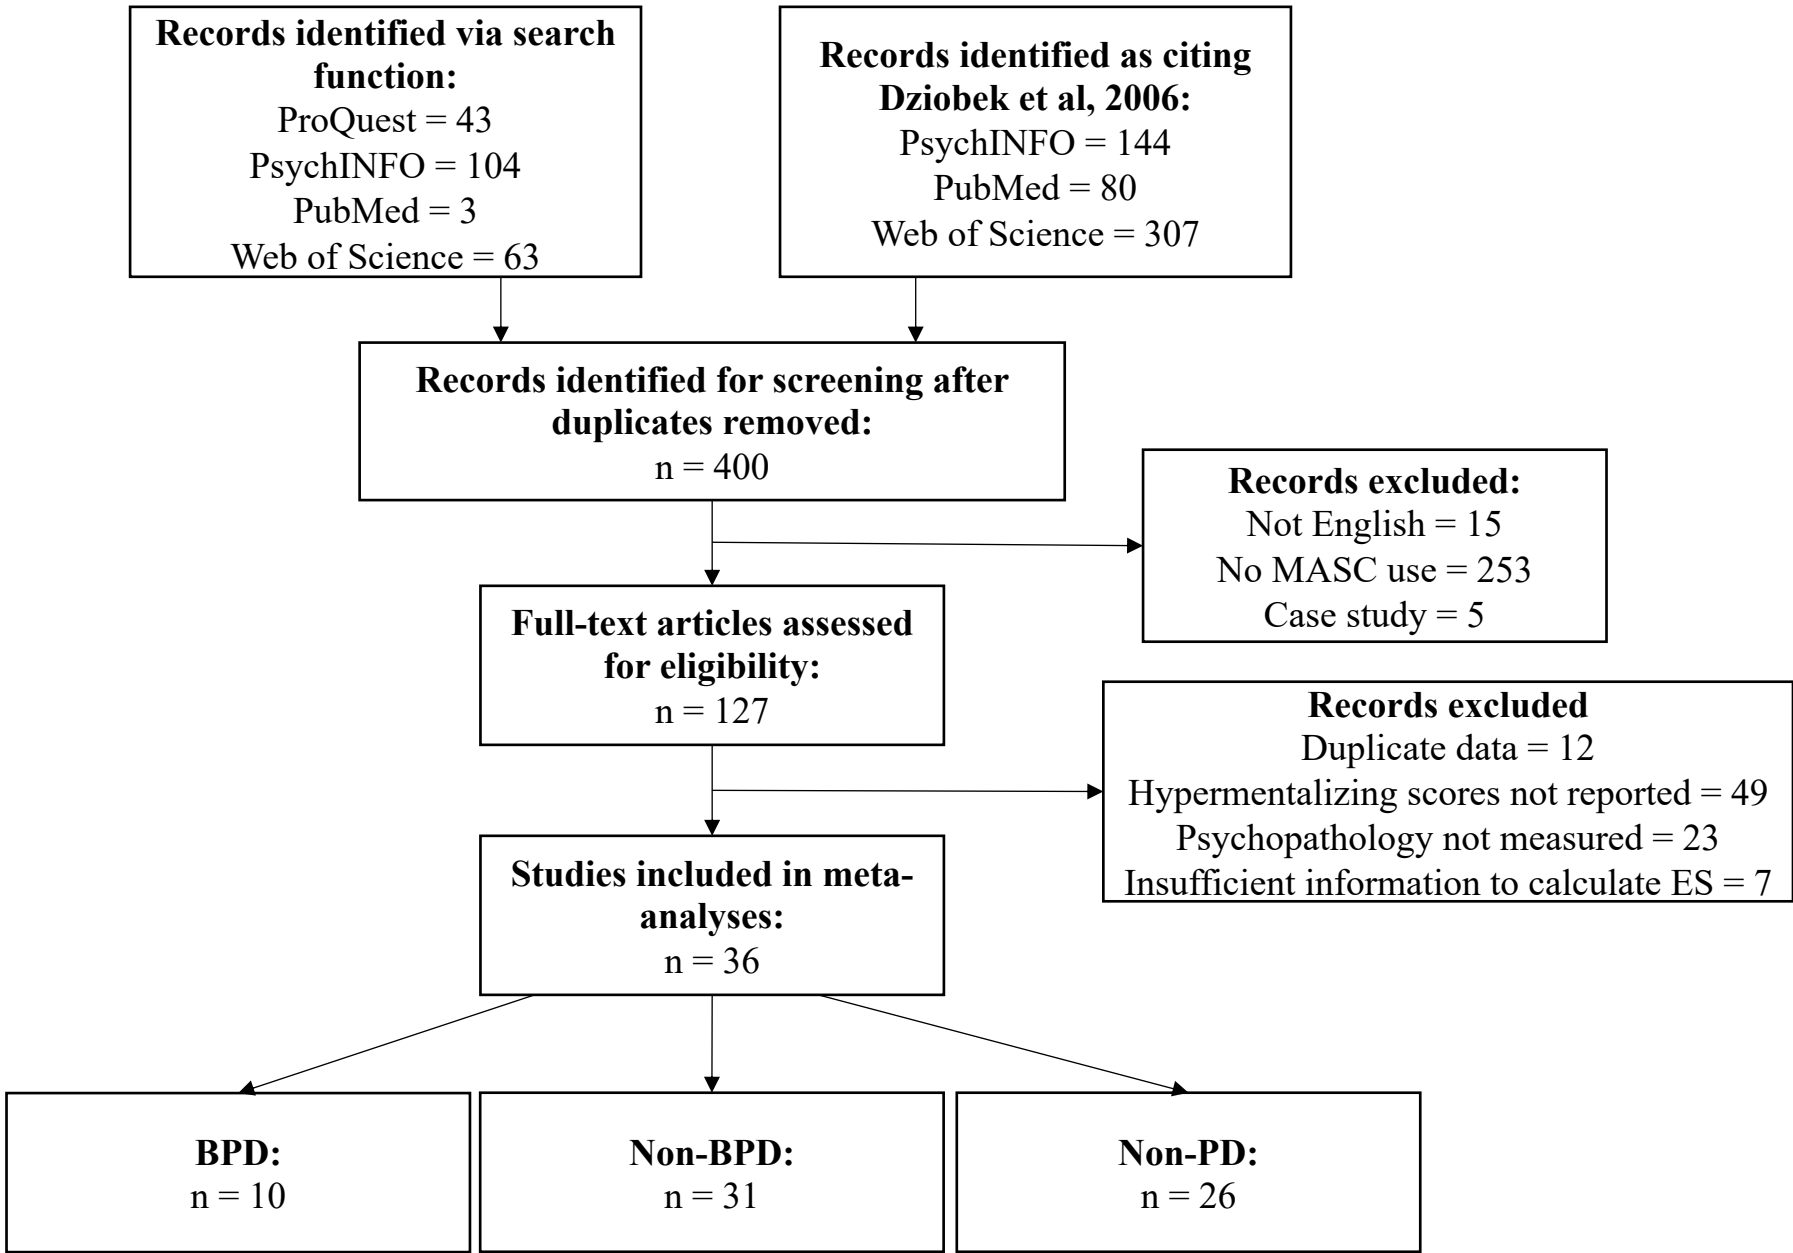

Supplement: appi.psychotherapy.20210018.ds001.pdf [file appi.psychotherapy.20210018.ds001.pdf]
